# Supplementary material for: Single-Cell Image-Based Analysis Reveals Chromatin Changes during the Acquisition of Tamoxifen Drug Resistance
Source: MDPI journal article supplement (doi:10.3390/life12030438), 2022-03-17
Supplement: s1 [file s1]

---

## Supporting Information

# Single-Cell Image-Based Analysis Reveals Chromatin Changes during the Acquisition of Tamoxifen Drug Resistance

Han Zhao <sup>1</sup>, Li F. Lin <sup>1</sup>, Joshua Hahn <sup>1</sup>, Junkai Xie <sup>1</sup>, Harvey F. Holman <sup>1</sup> and Chongli Yuan <sup>1,2</sup>

<sup>1</sup> Davidson School of Chemical Engineering, Purdue University, West Lafayette, IN 47907, USA

<sup>2</sup> Purdue University Center for Cancer Research, Purdue University, West Lafayette, IN 47906, USA

1. SUPPORTING TABLES
2. SUPPORTING FIGURES

## 1. SUPPORTING TABLES:

Table S1. Amino acid sequences of *in situ* epigenetic probes

| Probe             | Amino acid sequence*                                                                                             |     |     |     |     |
|-------------------|------------------------------------------------------------------------------------------------------------------|-----|-----|-----|-----|
| <sup>me</sup> CpG | 10                                                                                                               | 20  | 30  | 40  | 50  |
| Probe             | <b>MPKKKRKV</b> <i>GS</i> <i>GSGSGSGGSE</i> <i>FAEDWLDSPA</i> <i>LGPGWKRREV</i> <i>FRKSGATAGR</i>                |     |     |     |     |
|                   | 60                                                                                                               | 70  | 80  | 90  | 100 |
|                   | <i>SDTYYSPTG</i> <i>DRIRSKVELT</i> <i>RYLGPAAGLT</i> <i>LFDFKQILG</i> <i>GGQFAEDWLD</i>                          |     |     |     |     |
|                   | 110                                                                                                              | 120 | 130 | 140 | 150 |
|                   | <i>SPALGPGWKR</i> <i>REVFRKSGAT</i> <i>AGRSPTYYS</i> <i>PTGDRIRSKV</i> <i>ELTRYLGPAAG</i>                        |     |     |     |     |
|                   | 160                                                                                                              | 170 | 180 | 190 | 200 |
|                   | <i>DLTLFDFKQG</i> <i>ILGGQFVPV</i> <i>ATMVSKGEEL</i> <i>FTGVVPILVE</i> <i>LDGDNVGHKF</i>                         |     |     |     |     |
|                   | 210                                                                                                              | 220 | 230 | 240 | 250 |
|                   | <i>SVSGEGEGDA</i> <i>TYGKLTLEFI</i> <i>CTTGKLPVPW</i> <i>PTLVTTLTYG</i> <i>VQCFSRYPDH</i>                        |     |     |     |     |
|                   | 260                                                                                                              | 270 | 280 | 290 | 300 |
|                   | <i>MKQHDFFKSA</i> <i>MPEGYVQERT</i> <i>IFFKDDGNYK</i> <i>TRAEVKFEGD</i> <i>TLVNRIELKG</i>                        |     |     |     |     |
|                   | 310                                                                                                              | 320 | 330 | 340 | 350 |
|                   | <i>IDFKEDGNIL</i> <i>GHKLEYNYS</i> <i>HNVIYIMADKQ</i> <i>KNGIKVNFKI</i> <i>RHNIEDGVSQ</i>                        |     |     |     |     |
|                   | 360                                                                                                              | 370 | 380 | 390 | 400 |
|                   | <i>LADHYQQNT</i> <i>IGDGPVLLPD</i> <i>NHYLSTQSKL</i> <i>SKDPNEKRDH</i> <i>MVLLEFVTAA</i>                         |     |     |     |     |
|                   | 410                                                                                                              | 420 |     |     |     |
|                   | <i>GITLGMDELY</i> <i>K*</i>                                                                                      |     |     |     |     |
| H3K9me3           | 10                                                                                                               | 20  | 30  | 40  | 50  |
| Probe             | <b>MPKKKRKV</b> <i>GS</i> <i>GSGSGSGGSE</i> <i>FASQEFVEEA</i> <i>IVDKRQDKNG</i> <i>NTQYLVRWKG</i>                |     |     |     |     |
|                   | 60                                                                                                               | 70  | 80  | 90  | 100 |
|                   | <i>YDKQDDTWE</i> <i>EQHLMNCEKC</i> <i>VHDFNRRQTE</i> <i>KQKLTWTTT</i> <i>SRIFSNNAGS</i>                          |     |     |     |     |
|                   | 110                                                                                                              | 120 | 130 | 140 | 150 |
|                   | <i>GGGGGSQFAS</i> <i>QEFVEEAIVD</i> <i>KRQDKNGNTQ</i> <i>YLVRWKGYDK</i> <i>QDDTWEPEQH</i>                        |     |     |     |     |
|                   | 160                                                                                                              | 170 | 180 | 190 | 200 |
|                   | <i>LMNCEKCVHD</i> <i>FNRRQTEKQK</i> <i>KLTWTTTSRI</i> <i>FSNNA</i> <i>GS</i> <i>GGG</i> <i>GS</i> <i>QLGSGGV</i> |     |     |     |     |
|                   | 210                                                                                                              | 220 | 230 | 240 | 250 |
|                   | <i>DSCLPVATMV</i> <i>SKGEELFTGV</i> <i>VPILVELDGD</i> <i>VNGHKFSVSG</i> <i>EGEGDATYK</i>                         |     |     |     |     |
|                   | 260                                                                                                              | 270 | 280 | 290 | 300 |
|                   | <i>LTLKFICTTG</i> <i>KLPVPWPTLV</i> <i>TTLTYGVQCF</i> <i>SRYPDHMKQH</i> <i>DFFKSAMPEG</i>                        |     |     |     |     |
|                   | 310                                                                                                              | 320 | 330 | 340 | 350 |
|                   | <i>YVQERTIFFK</i> <i>DDGNYKTRAE</i> <i>VKFEGDTLVN</i> <i>RIELKGIDFK</i> <i>EDGNILGHKL</i>                        |     |     |     |     |
|                   | 360                                                                                                              | 370 | 380 | 390 | 400 |
|                   | <i>EYNYNSHNVI</i> <i>IMADKQKNGI</i> <i>KVNFKIRHNI</i> <i>EDGSVQLADH</i> <i>YQNTPIGDG</i>                         |     |     |     |     |
|                   | 410                                                                                                              | 420 | 430 | 440 | 450 |
|                   | <i>PVLLPDNHYL</i> <i>STQSKLSKDP</i> <i>NEKRDHMLL</i> <i>EFVTAAGITL</i> <i>GMDELYK*</i>                           |     |     |     |     |

\*: Nucleus localization sequence

Linker

[Dimeric reader domains](#)

[GFP](#)

**Table S2.** Top ranked features contributing to the distinction between MCF7 and TamR cells with their respective Lasso coefficients.

| <b>5mC Lasso Coefficient</b> | <b>Feature</b>                    |
|------------------------------|-----------------------------------|
| 0.285341                     | Intensity_MaxIntensity            |
| 0.232295                     | Mean_Foci_Texture_InfoMeas2       |
| 0.136416                     | Mean_Foci_Intensity_MinIntensity_ |
| -0.11715                     | Mean_Foci_Texture_Contrast        |
| -0.09716                     | Number of Foci_Count              |

| <b>H3K9me3 Lasso Coefficient</b> | <b>Feature</b>              |
|----------------------------------|-----------------------------|
| 0.376078                         | Texture_Entropy             |
| 0.324195                         | Texture_SumAverage          |
| -0.23239                         | Texture_DifferenceEntropy   |
| -0.10407                         | Texture_InfoMeas2           |
| 0.090125                         | Texture_AngularSecondMoment |

| <b>H3K27me3 Lasso Coefficient</b> | <b>Feature</b>                   |
|-----------------------------------|----------------------------------|
| -0.65099                          | Texture_DifferenceEntropy        |
| -0.51921                          | Texture_AngularSecondMoment      |
| 0.337793                          | Intensity_LowerQuartileIntensity |
| 0.113467                          | Intensity_IntegratedIntensity    |
| -0.06518                          | AreaShape_Extent                 |

| <b>H3K27ac Lasso Coefficient</b> | <b>Feature</b>            |
|----------------------------------|---------------------------|
| -1.76596                         | Texture_Entropy           |
| 1.362131                         | Texture_SumEntropy        |
| 0.574568                         | Intensity_MedianIntensity |
| -0.29018                         | Intensity_MADIntensity    |
| -0.20887                         | Intensity_MaxIntensity    |

## 2. SUPPORTING FIGURES

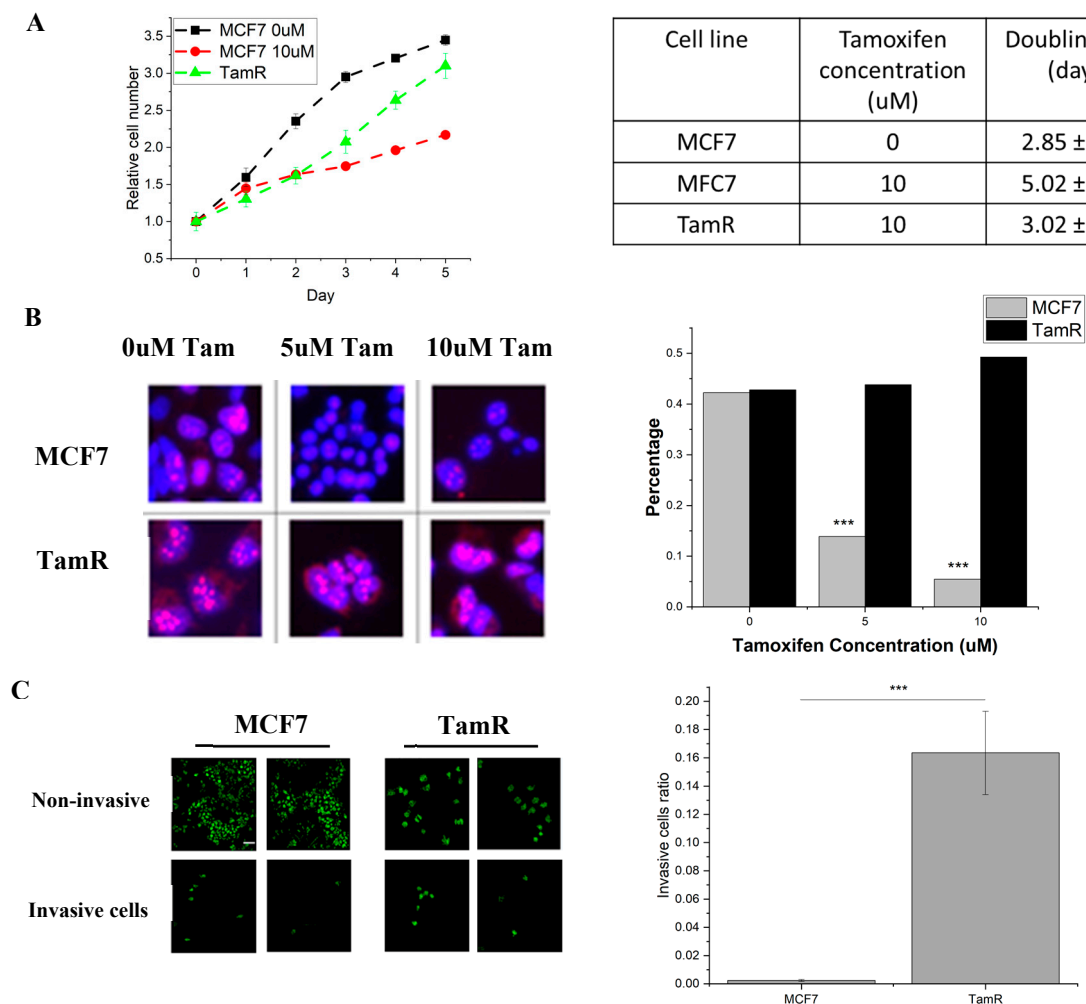

**Figure S1.** (A) Growth curve of MCF7 cells in the presence and absence of 10 uM TAM and TamR in the presence of 10 uM Tam and fitted doubling time. (B) Representative images of MCF7 and TamR cells stained with Ki67 and quantification of percentage of Ki67 positive cells. (C) Invasiveness assay of MCF7 and MCF7-R cell line with 0.4µm PET membrane. Scale bar = 20 µm. Cells remains on membrane surface are counted as non-invasive cells. Cells penetrate through the membrane are counted as invasive cells. Invasive cells divided by total cells number are used to calculate invasiveness ratio. Invasiveness assay was performed with n = 3 biological replicates. \*\*\* : indicates  $p < 0.001$ .

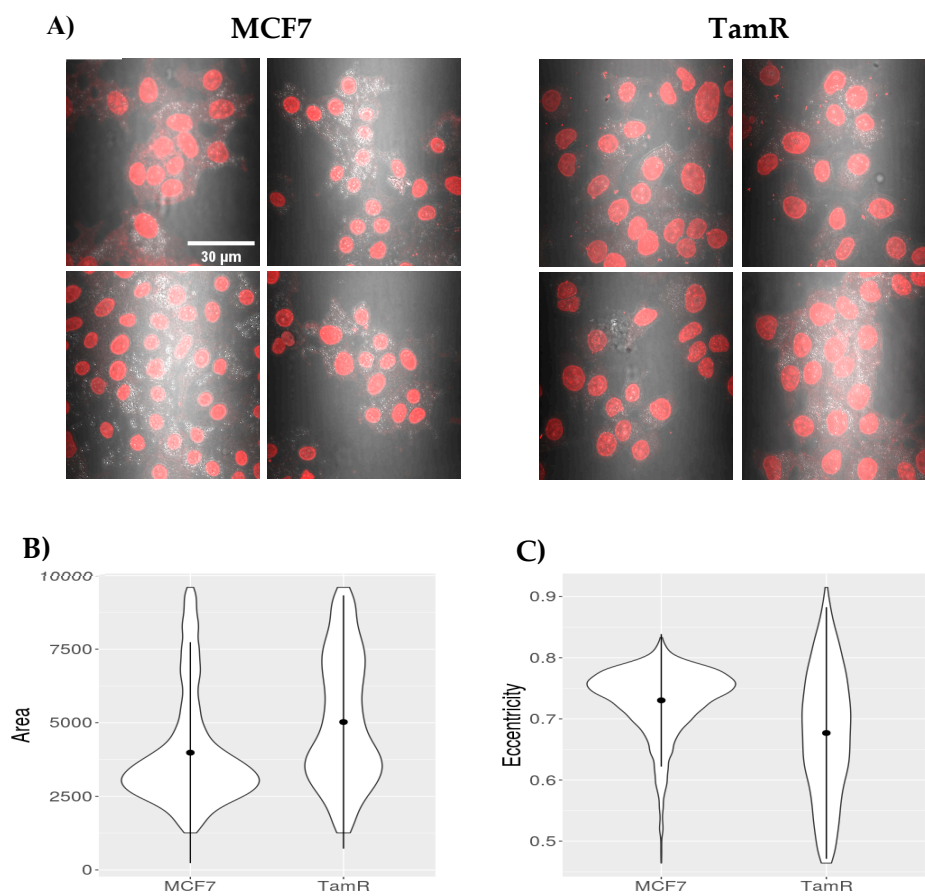

**Figure S2.** (A) Draq5 staining of MCF7 cells overlaid with DIC images (left), and Draq5 staining of TamR cells (right). (B) Violin plot of nuclear area in MCF7 and TamR cells. The dot represents the mean value and line represents standard deviation. (C) Eccentricity of MCF7 and TamR cell lines.

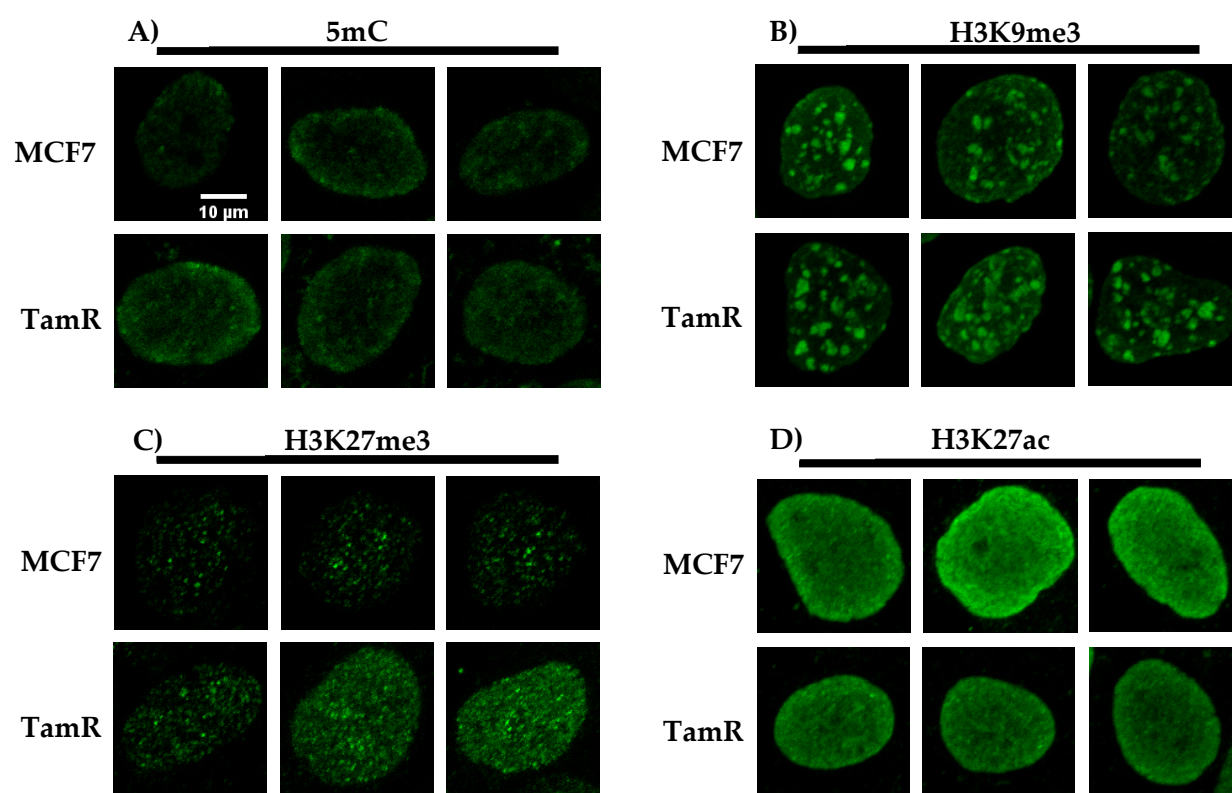

**Figure S3.** Representative images of MCF7 and TamR cells stained with (A) 5mC, (B) H3K9me3, (C) H3K27me3 and (D) H3K27ac antibodies.

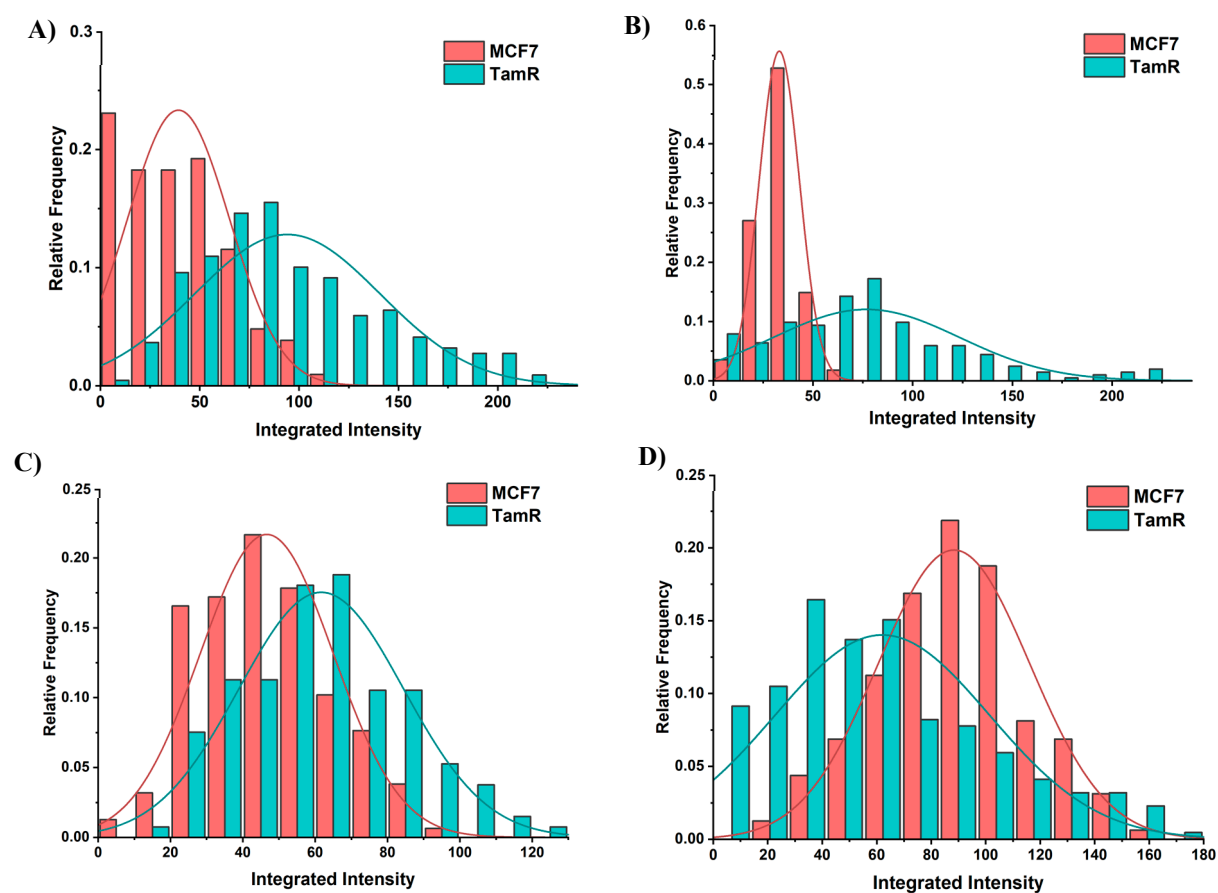

**Figure S4.** Histograms of integrated intensity of (A) 5mC, (B) H3K9me3, (C) H3K27me3 and (D) H3K27ac from single nuclei of MCF7 and TamR cells. All histograms are fitted with normal distribution.



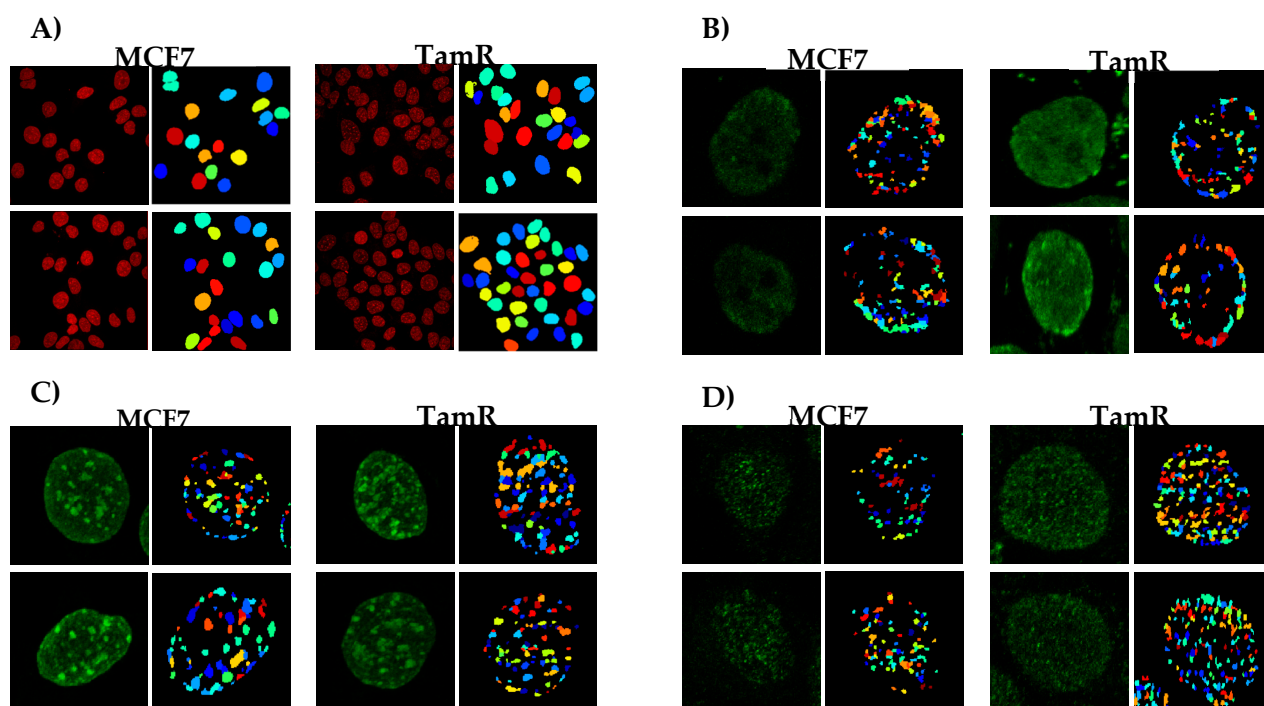

**Figure S5.** (A) Draq5 nuclear staining of MCF7 and TamR (red) and objects identified as nuclei by CellProfiler analysis (multicolor). (B) MCF7 and TamR cells stained for DNA methylation (green); DNA methylation islands representing foci-like features within nuclei identified by CellProfiler (multicolor). (C) MCF7 and TamR cells stained for H3K9me3 (green); H3K9me3 islands representing foci-like features within nuclei identified by CellProfiler (multicolor). (D) MCF7 and TamR cells stained for H3K27me3 (green); H3K27me3 islands representing foci-like features within nuclei identified by CellProfiler (multicolor).

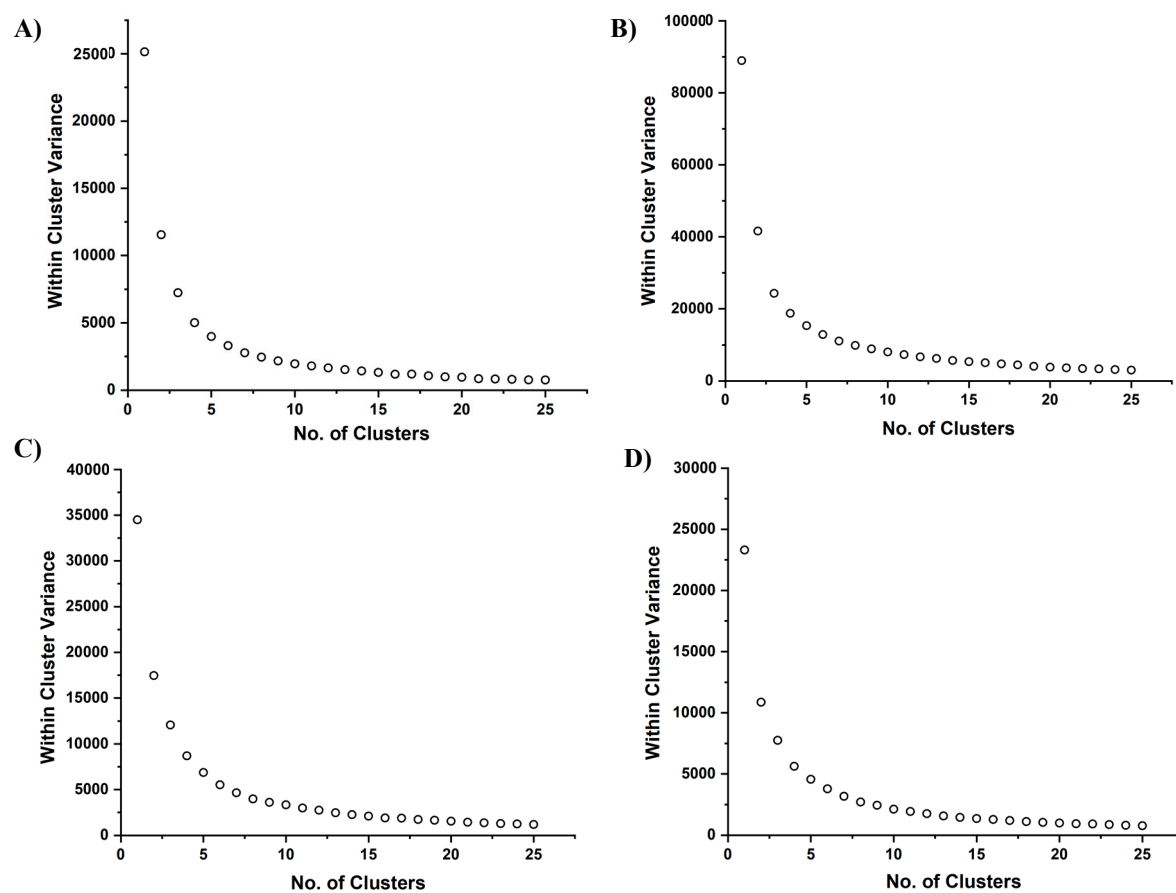

**Figure S6.** Elbow plot of attempted cluster numbers v.s. within cluster variance to determine number of clusters.

(A) 5mC. (B) H3K9me3. (C) H3K27me3. (D) H3K27ac.
